# Supplementary material for: The Relationship between Body Composition and Physical Fitness and the Effect of Exercise According to the Level of Childhood Obesity Using the MGPA Model
Source: MDPI journal article supplement (doi:10.3390/ijerph19010487), 2022-01-02
Supplement: s1 [file s1]

**Table S1.** Correlation between BMI, Height, Weight, %BF and SMM according to obesity status

| Variable   | BMI | Height | Weight | %BF     | SMM     |
|------------|-----|--------|--------|---------|---------|
| <b>NO</b>  |     |        |        |         |         |
| BMI        | 1   | -.177  | .812** | .192    | .496*   |
| Height     |     | 1      | .419   | -.316   | .318    |
| Weight     |     |        | 1      | -.020   | .687**  |
| %BF        |     |        |        | 1       | -.300   |
| SMM        |     |        |        |         | 1       |
| <b>OW</b>  |     |        |        |         |         |
| BMI        | 1   | -.580* | .233   | .194    | -.396   |
| Height     |     | 1      | .650** | -.612*  | .696**  |
| Weight     |     |        | 1      | -.608*  | .473    |
| %BF        |     |        |        | 1       | -.418   |
| SMM        |     |        |        |         | 1       |
| <b>OB</b>  |     |        |        |         |         |
| BMI        | 1   | -.083  | .852** | .211    | .024    |
| Height     |     | 1      | .418*  | -.392*  | .542**  |
| Weight     |     |        | 1      | .059    | .234    |
| %BF        |     |        |        | 1       | -.931** |
| SMM        |     |        |        |         | 1       |
| <b>SOB</b> |     |        |        |         |         |
| BMI        | 1   | -.332  | .840** | .533**  | -.185   |
| Height     |     | 1      | .227   | -.703** | .678**  |
| Weight     |     |        | 1      | .148    | .200    |
| %BF        |     |        |        | 1       | -.883** |
| SMM        |     |        |        |         | 1       |

NO=Normal, OW=Overweight, OB= Obesity, SOB=Severe obesity. Note: \*p<.05, \*\*p<.01.

**Table S2.** Correlation between body composition and physical fitness

| Variable | Muscle strength | Flexibility | Muscle endurance | Power    | Balance |
|----------|-----------------|-------------|------------------|----------|---------|
| BMI      | .206**          | -.042       | -.265***         | -.256*** | -.206** |
| Height   | .687***         | -.115       | .114             | .122     | .125    |
| Weight   | .570***         | -.095       | -.090            | -.081    | -.053   |
| %BF      | .180*           | .023        | -.248**          | -.556*** | -.039   |
| SMM      | .254**          | -.120       | .014             | .430***  | -.215** |

%BF: Percentage of body fat, SMM: Skeletal muscle mass. Note: \*p<.05, \*\*p<.01, \*\*\*p<.001.

Pearson's correlation is analyzed to investigate the relationship between body composition variables and physical fitness. Muscle strength is found to be positively correlated with all variables including BMI ( $r=.206$ ,  $p<.01$ ), height ( $r=.687$ ,  $p<.001$ ), weight ( $r=.570$ ,  $p<.001$ ), %BF ( $r=.180$ ,  $p<.05$ ) and skeletal muscle mass ( $r=.254$ ,  $p<.01$ ). Flexibility does not show a significant correlation with any of the variables. Muscle endurance is found to have a negative correlation with variables BMI ( $r=-.265$ ,  $p<.001$ ) and %BF ( $r=-.248$ ,  $p<.01$ ). Agility showed a strong correlation with BMI ( $r=-.256$ ,  $p<.001$ ), %BF ( $r=-.556$ ,  $p<.001$ ) and skeletal muscle mass ( $r=.430$ ,  $p<.001$ ). Balance showed a negative correlation with BMI ( $r=-.206$ ,  $p<.001$ ) and skeletal muscle mass ( $r=-.215$ ,  $p<.01$ ).

**Table S3.** Effects of body composition on physical fitness: stepwise multiple regression analysis results

|                                                              | dependent variable         | <i>B</i> | <i>SE</i> | $\beta$ | <i>t</i>  | <i>DF</i> | <i>F</i>   |
|--------------------------------------------------------------|----------------------------|----------|-----------|---------|-----------|-----------|------------|
| Height                                                       | Muscle strength (Handgrip) | .296     | .025      | .687    | 12.038*** | 1         | 144.923*** |
| R=.687, R <sup>2</sup> =.472, Adjusted R <sup>2</sup> =.469  |                            |          |           |         |           |           |            |
| BMI                                                          | Muscle endurance           | -1.454   | .339      | -.525   | -4.288*** | 2         | 9.925***   |
| Weight                                                       |                            | .293     | .110      | .328    | 2.675**   |           |            |
| R= .331, R <sup>2</sup> =.110, Adjusted R <sup>2</sup> =.099 |                            |          |           |         |           |           |            |
| %BF                                                          | Power                      | -1.655   | .215      | -.481   | -7.685*** | 2         | 54.469***  |
| SMM                                                          |                            | 1.924    | .381      | .316    | 5.054***  |           |            |
| R= .635, R <sup>2</sup> =.404, Adjusted R <sup>2</sup> =.396 |                            |          |           |         |           |           |            |
| SMM                                                          |                            | -3.091   | .595      | -.471   | -5.197*** | 3         | 10.288***  |
| Height                                                       | Balance                    | 1.135    | .251      | .407    | 4.516***  |           |            |
| %BF                                                          |                            | -.875    | .299      | -.236   | -2.926**  |           |            |
| R= .402, R <sup>2</sup> =.162, Adjusted R <sup>2</sup> =.146 |                            |          |           |         |           |           |            |

%BF: Percentage of body fat, SMM: Skeletal muscle mass. Note: \*p<.05, \*\*p<.01, \*\*\*p<.001.

Height predicts grip strength with 46.9% (Adjusted R<sup>2</sup>=.469) explanatory power, while height was the only variable among body composition variables that had an effect of .687 on grip strength. BMI and weight were able to predict muscle endurance with 9.9% (Adjusted R<sup>2</sup>=.099) explanatory power, and BMI ( $\beta$ =-.525) was found to have a greater effect than weight ( $\beta$ =.328). %BF and SMM predict agility with 63.5% (Adjusted R<sup>2</sup>=.635) explanatory power, and %BF ( $\beta$ =-.481) was found to have a greater effect than SMM ( $\beta$ =.316). Height predicts balance with 14.6% (Adjusted R<sup>2</sup>=.146) explanatory power, and SMM ( $\beta$ =-.471) was found to have a greater effect than height ( $\beta$ =.407) or %BF ( $\beta$ =-.236).

**Table S4.** Effect of exercise program on body composition by obesity in children

| Variable |      | NO<br>(n=19)       | OW<br>(n=15)       | OB<br>(n=35)       | SOB<br>(n=32)      |     | 2RM        | F          | Post-hoc     |
|----------|------|--------------------|--------------------|--------------------|--------------------|-----|------------|------------|--------------|
| BMI      | Pret | 18.38±2.73         | 22.05±0.57         | 24.14±0.92         | 27.12±2.28         | T   | 4.537*     | 105.461*** | NO<OW<OB<SOB |
|          | Post | 18.30±2.33         | 22.01±0.73         | 23.85±1.29         | 26.67±2.65\$\$     | G   | 93.970***  | 73.639***  | NO<OW<OB<SOB |
|          | Diff | -0.09±0.71         | -0.04±0.40         | -0.29±0.81         | -0.45±1.39         | T×G | .924       | .838       |              |
| Height   | Pre  | 137.15±10.37       | 140.10±11.10       | 139.83±9.69        | 145.74±9.60        | T   | 104.523*** | 3.510*     | NO<OW<OB<SOB |
|          | Post | 139.42±10.28\$\$\$ | 141.66±12.42\$\$\$ | 141.60±10.11\$\$\$ | 147.63±10.13\$\$\$ | G   | 3.310*     | 3.092*     | NO<OW<OB<SOB |
|          | Diff | 2.26±1.81          | 1.56±1.58          | 1.77±1.22          | 1.89±2.17          | T×G | .530       | .530       |              |
| Weight   | Pret | 34.75±6.53         | 43.55±7.22         | 47.52±7.33         | 57.78±8.12         | T   | 10.987**   | 40.335***  | NO<OW,OB<SOB |
|          | Post | 35.80±6.98         | 44.46±7.82         | 48.19±8.08         | 58.30±9.04         | G   | 36.448***  | 31.860***  | NO<OW,OB<SOB |
|          | Diff | 1.05±1.63          | 0.91±0.84          | 0.67±1.82          | 0.53±3.22          | T×G | .256       | .256       |              |
| %BF      | Pre  | 17.89±5.02         | 21.23±4.82         | 26.27±5.71         | 32.98±7.60         | T   | 6.426*     | 27.699***  | NO<OB<SOB    |
|          | Post | 17.99±4.54         | 20.76±4.37         | 25.53±4.83         | 29.58±5.80\$\$\$   | G   | 30.060***  | 24.468***  | NO,OW<OB,SOB |
|          | Diff | 0.11±1.09          | -0.47±1.60         | -0.74±3.58         | -3.40±6.27         | T×G | 3.750*     | 3.750*     | SOB<NO       |
| SMM      | Pre  | 13.14±3.47         | 17.53±4.05         | 16.77±4.01         | 17.31±5.61         | T   | 12.314***  | 4.143**    | NO<OB,SOB    |
|          | Post | 13.64±3.47         | 17.92±4.20         | 17.75±3.64         | 20.40±4.45\$\$\$   | G   | 7.992***   | 11.510***  | NO<OW,OB,SOB |
|          | Diff | 0.50±0.53          | 0.30±0.73          | 0.98±2.65          | 3.09±5.15          | T×G | 3.864*     | 3.857*     | NO,OW<SOB    |

NO=Normal, OW=Overweight, OB= Obesity, SOB=Severe obesity, %BF: Percentage of body fat, SMM: Skeletal muscle mass.

Note: \*p<.05, \*\*p<.01, \*\*\*p<.001, \$\$p<.01. \$\$\$p<.001 vs pre-exercise.

**Table S5.** Effect of exercise program on physical fitness by obesity in children

| Variable                 |      | NO<br>(n=19)                 | OW<br>(n=15)                | OB<br>(n=35)                   | SOB<br>(n=32)                  | 2RM |           | F       |
|--------------------------|------|------------------------------|-----------------------------|--------------------------------|--------------------------------|-----|-----------|---------|
| Muscle strength (kg)     | Pre  | 14.02±4.04                   | 15.71±3.43                  | 15.85±3.99                     | 17.48±4.80                     | T   | 36.294*** | 2.773*  |
|                          | Post | 15.38±4.22 <sup>\$\$</sup>   | 17.01±4.44 <sup>\$</sup>    | 16.73±5.03 <sup>\$</sup>       | 19.55±5.87 <sup>\$\$\$</sup>   | G   | 3.054*    | 3.111*  |
|                          | Diff | 1.37±1.85                    | 1.30±1.73                   | 0.89±2.15                      | 2.07±2.61                      | T×G | 1.626     | 1.626   |
| Flexibility (times)      | Pre  | 7.59±6.47                    | 6.69±3.56                   | 6.90±7.75                      | 6.82±4.43                      | T   | 66.505*** | .086    |
|                          | Post | 10.02±6.96 <sup>\$\$\$</sup> | 9.57±3.65 <sup>\$\$\$</sup> | 8.65±7.69 <sup>\$\$\$</sup>    | 9.55±4.65 <sup>\$\$\$</sup>    | G   | .909      | .239    |
|                          | Diff | 2.42±2.20                    | 2.89±3.13                   | 1.75±2.92                      | 2.73±2.93                      | T×G | .122      | .909    |
| Muscle endurance (times) | Pre  | 21.37±9.66                   | 16.80±9.49                  | 17.43±6.68                     | 14.72±8.04                     | T   | 33.673*** | 2.659   |
|                          | Post | 24.89±10.90 <sup>\$</sup>    | 21.67±9.77 <sup>\$\$</sup>  | 20.00±8.15 <sup>\$</sup>       | 20.19±9.69 <sup>\$\$\$</sup>   | G   | 1.998     | 1.293   |
|                          | Diff | 3.53±5.32                    | 4.87±8.60                   | 2.57±4.61                      | 5.47±8.18                      | T×G | 1.161     | 1.161   |
| Power (cm)               | Pre  | 137.26±18.71                 | 127.87±17.92                | 120.00±22.62                   | 113.59±30.15                   | T   | 34.435*** | 4.205** |
|                          | Post | 144.68±15.52                 | 136.27±16.82                | 133.83±18.26 <sup>\$\$\$</sup> | 133.61±20.36 <sup>\$\$\$</sup> | G   | 3.671*    | 1.771   |
|                          | Diff | 7.42±6.39                    | 8.40±8.03                   | 13.83±18.09                    | 20.02±28.97                    | T×G | 2.039     | 2.039   |
| Balance (sec)            | Pre  | 37.21±40.15                  | 19.85±16.75                 | 20.24±18.96                    | 19.55±21.12                    | T   | 39.316*** | 2.538   |
|                          | Post | 49.91±39.30 <sup>\$\$</sup>  | 30.39±15.72 <sup>\$</sup>   | 33.29±23.78 <sup>\$\$\$</sup>  | 31.40±21.81 <sup>\$\$\$</sup>  | G   | 2.916*    | 2.584   |
|                          | Diff | 12.70±20.64                  | 10.54±10.77                 | 12.05±19.23                    | 11.85±16.81                    | T×G | .043      | .043    |

NO=Normal, OW=Overweight, OB= Obesity, SOB=Severe obesity. Note: \*p<.05, \*\*p<.01, \*\*\*p<.001. \$p<.05, \$\$p<.01, \$\$\$p<.001 vs pre-exercise.
